# Supplementary material
Source: Springer Nature journal article supplement (https://www.springermedizin.de/resource/supplementary/13012_2011_508_MOESM1_ESM.pdf/9630108)

# Absolute effect size

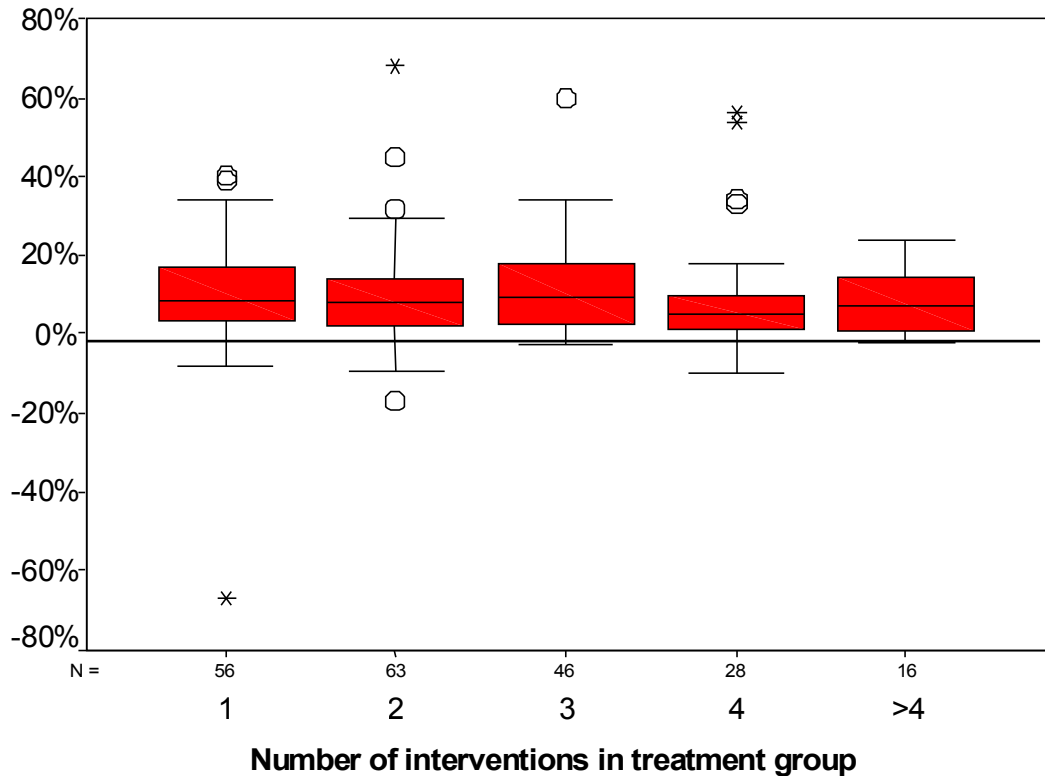

Supplement: MOESM1 [file 9630108]
